# Supplementary material for: Observation of the anomalous Hall effect in proximity coupled Cr2Ge2Te6/graphene heterostructures
Source: Royal Society of Chemistry journal article supplement (doi:10.1039/d4nr04037f), 2025-01-01
Supplement: d4nr04037f1.pdf [file d4nr04037f1.pdf]

## Supporting Information

### Observation of anomalous Hall effect in proximity coupled $\text{Cr}_2\text{Ge}_2\text{Te}_6$ /Graphene heterostructures

S. Yao,<sup>1</sup> L. H. Ye,<sup>1</sup> C. Liu,<sup>1</sup> Z. Liu,<sup>1</sup> N. Kang,<sup>1</sup> H. Q. Xu,<sup>1,\*</sup> and J. H. Liao<sup>1,†</sup>

<sup>1</sup>*Key Laboratory for the Physics and Chemistry of Nanodevices,  
School of Electronics, Peking University, Beijing 100871, China*

#### Contents

1. FigureS1: Magnetization characterizations of a bulk  $\text{Cr}_2\text{Ge}_2\text{Te}_6$  crystal.
2. FigureS2: AHE resistance at different temperatures in device 2.
3. FigureS3: AHE resistance at different temperatures in device 3.
4. FigureS4: The graphene-only device.
5. FigureS5: Atomic configuration for density function calculations.
6. FigureS6: The relationship between the anomalous Hall resistance  $R_{AHE}$  and the longitudinal resistance  $R_{xx}$ .

---

\*Electronic address: hqxu@pku.edu.cn

†Electronic address: Jianhui.Liao@pku.edu.cn

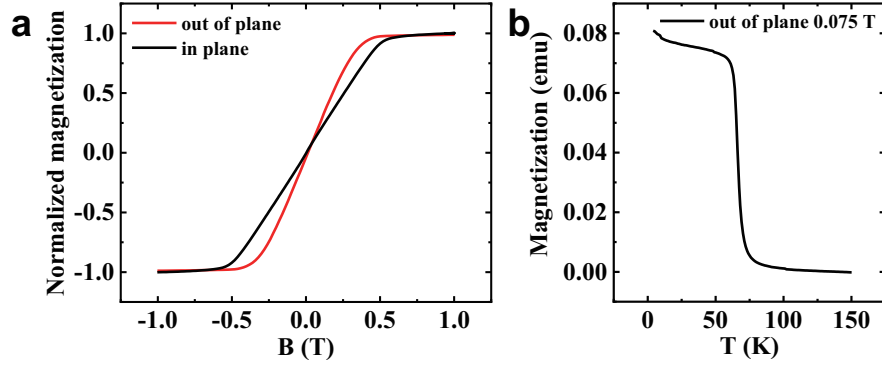

FIG. S1: Magnetization characterizations of a bulk  $\text{Cr}_2\text{Ge}_2\text{Te}_6$  crystal. (a) Magnetization characterization by SQUID at 4K, showing that  $\text{Cr}_2\text{Ge}_2\text{Te}_6$  has an out-of-plane easy axis. (b) Temperature-dependent magnetization characterization under a 0.075 T out-of-plane field, showing  $T_C$  66 K by SQUID at 4 K.

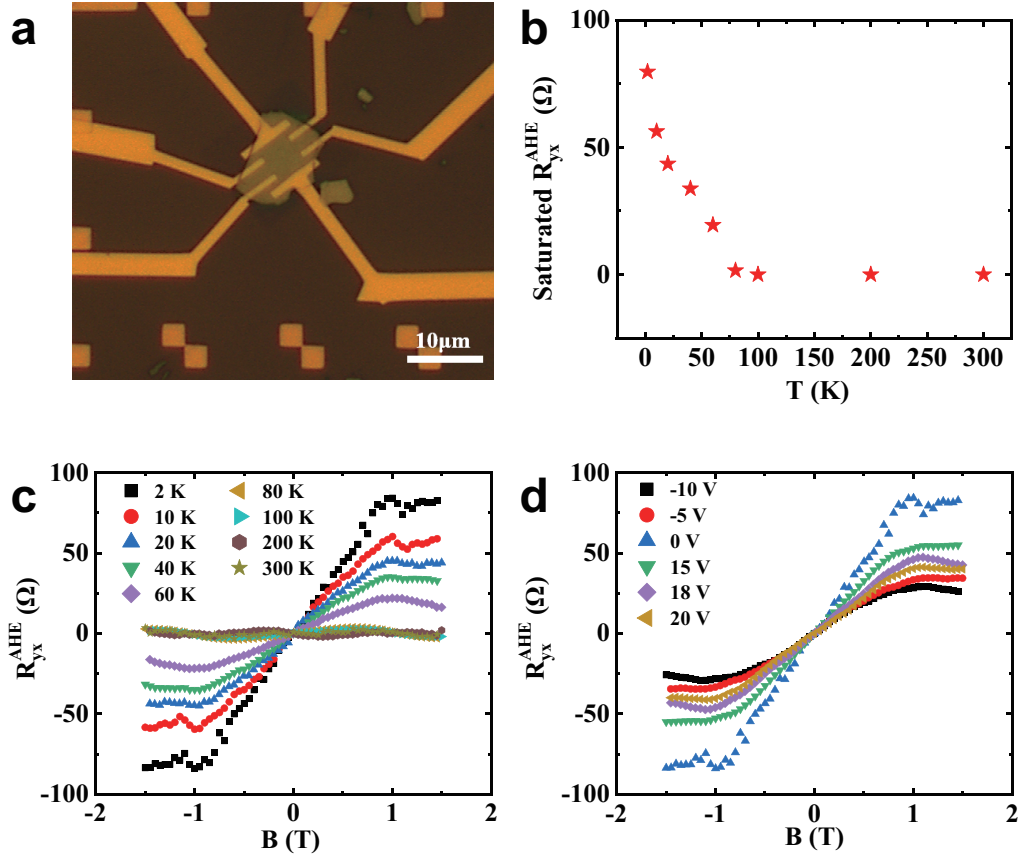

FIG. S2: AHE resistance at different temperatures in device 2. (a) Optical image of the device. (b) The temperature dependence of saturated anomalous Hall resistance of Graphene/CGT. (c) Anomalous Hall resistance of Graphene/CGT measured from 2 K to 300 K. (d) Anomalous Hall resistance of Graphene/CGT at different gate voltages.

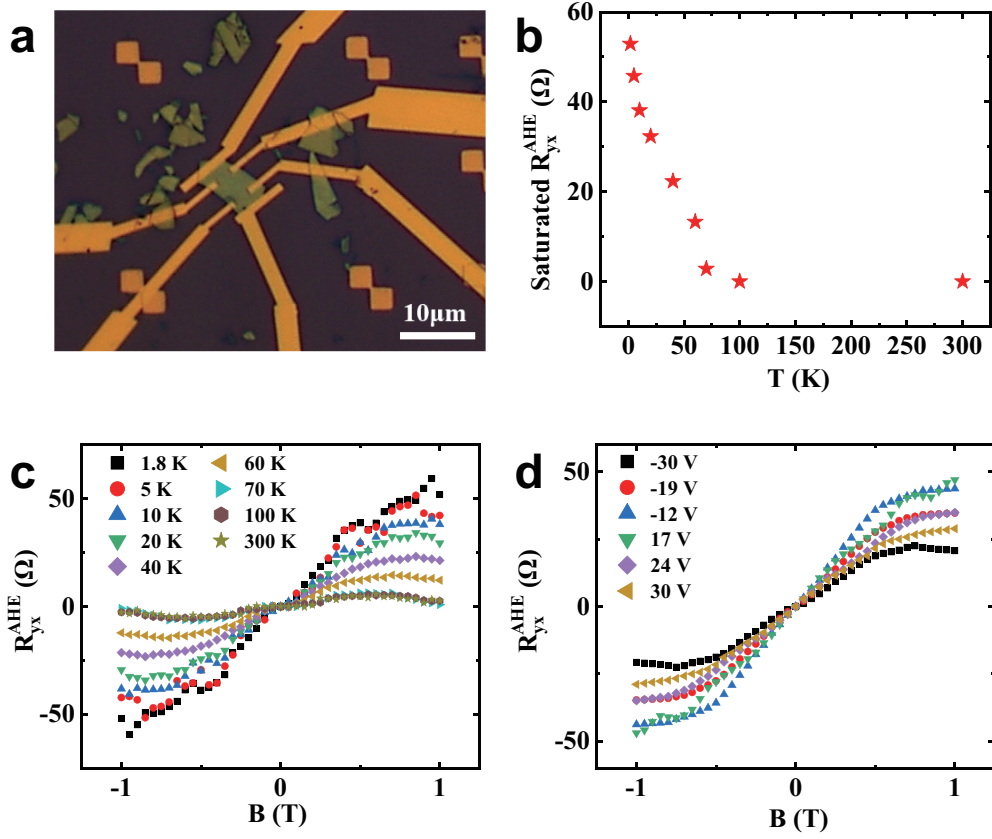

FIG. S3: AHE resistance at different temperatures in device 3. (a) Optical image of the device. (b) The temperature dependence of saturated anomalous Hall resistance of Graphene/CGT. (c) Anomalous Hall resistance of Graphene/CGT measured from 2 K to 300 K. (d) Anomalous Hall resistance of Graphene/CGT at different gate voltages.

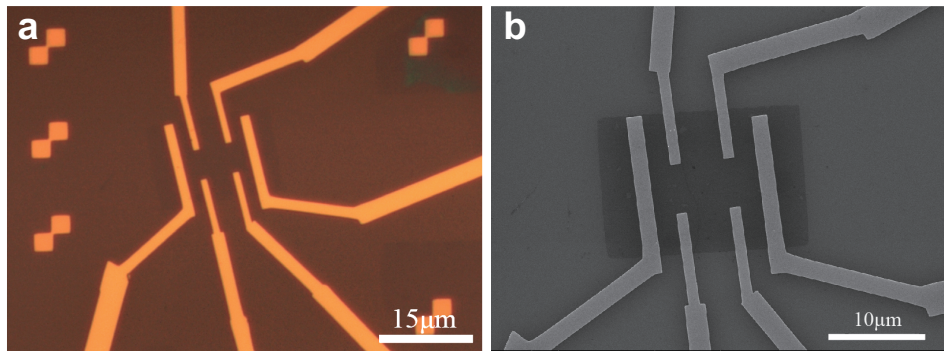

FIG. S4: **The graphene-only device.** (a) The optical image of the graphene-only device. (b) The SEM image of the graphene-only device.

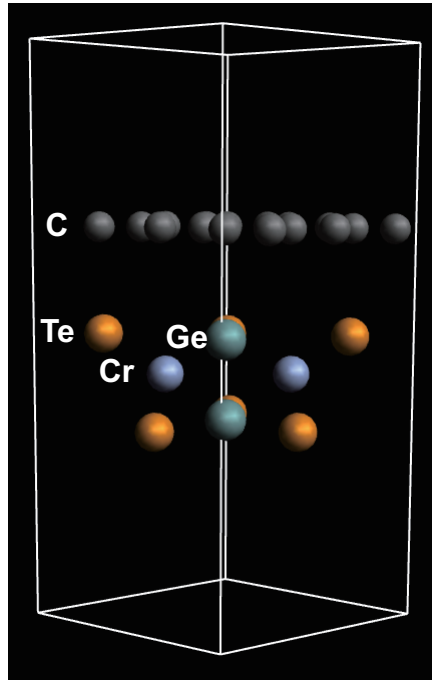

FIG. S5: Atomic configuration for density functional calculations.

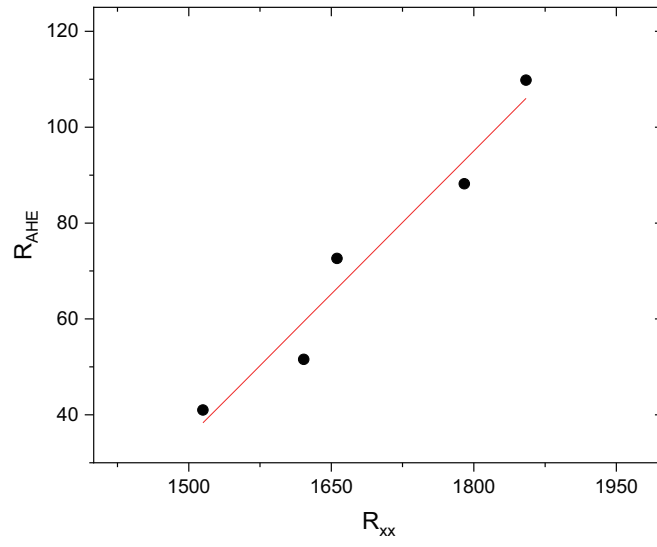

FIG. S6: The relationship between the anomalous Hall resistance  $R_{AHE}$  and the longitudinal resistance  $R_{xx}$ . The red line is the linear fitting to the data.
